# Supplementary material
Source: publisher figshare collection journal article supplement (https://acs.figshare.com/ndownloader/files/3605994)
Supplement: Supplementary file 1 [file 3605994]

Supporting information:

## Ultrafast Charge Transfer in Nickel Phthalocyanine Probed by Femtosecond Raman-Induced Kerr Effect Spectroscopy

Gurusamy Balakrishnan, Alexandra V. Soldatova, Philip J. Reid, and Thomas G. Spiro\*

*Department of Chemistry, University of Washington, Seattle WA 98195*

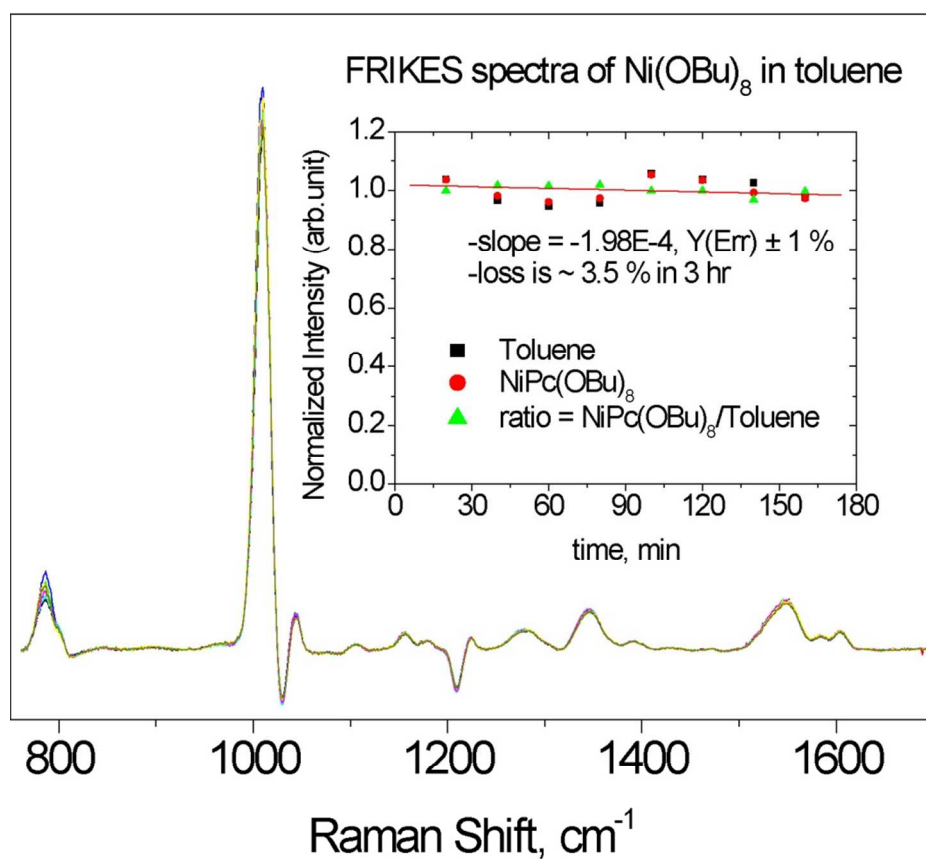

**Figure S1.** To check the sample integrity, ground state FRIKES spectra of NiPc(OBu)<sub>8</sub> (in toluene, with a 796 nm pump) were measured periodically during the time-resolved experiment. Inset shows the intensity variation of the FRIKES band at 1551 cm<sup>-1</sup> [NiPc(OBu)<sub>8</sub>] and 1604 cm<sup>-1</sup> [toluene] and their ratio.

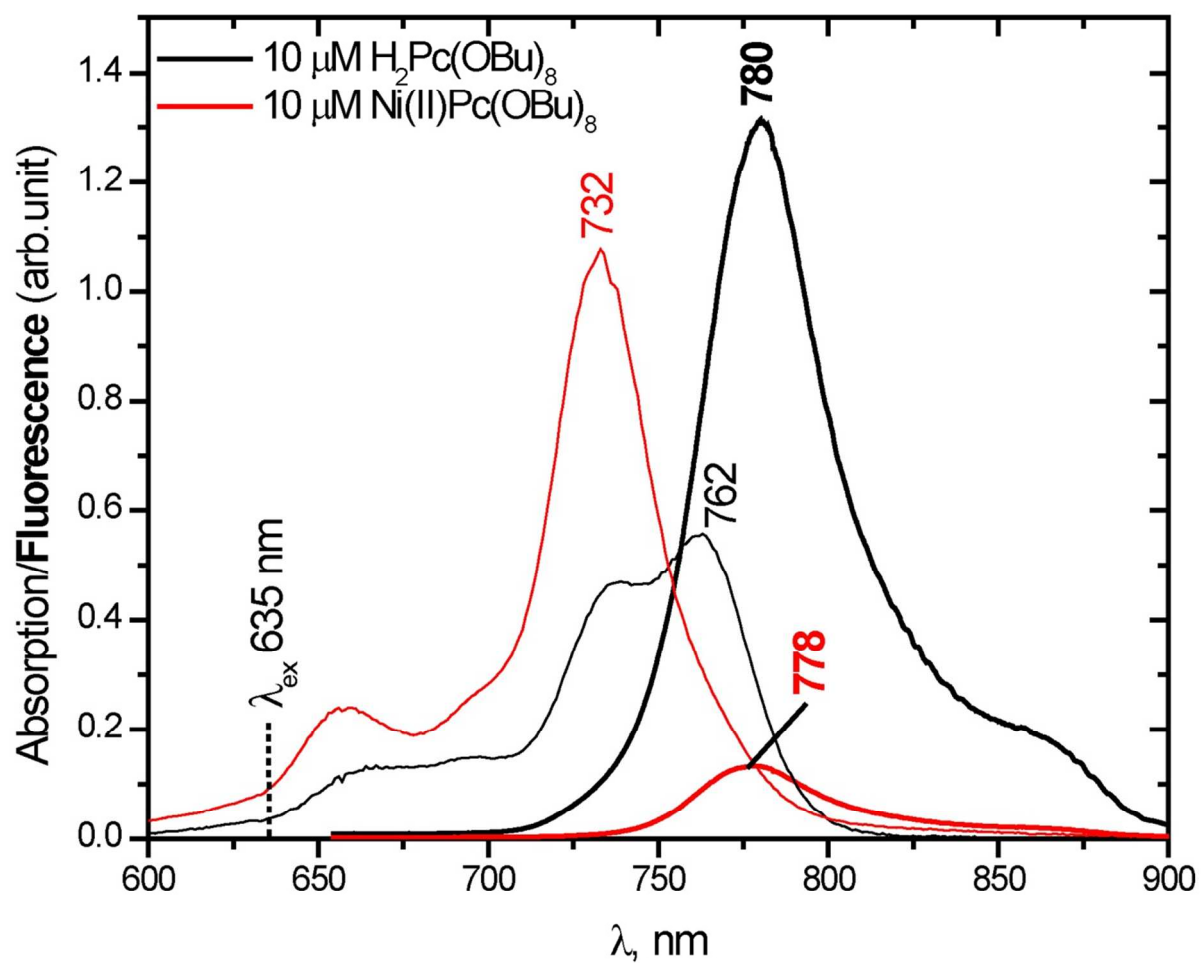

**Figure S2.** Absorption and emission (excited at 635 nm) spectra of octabutoxyphthalocyanine free base (black) and of the Ni(II) complex (red) in toluene.

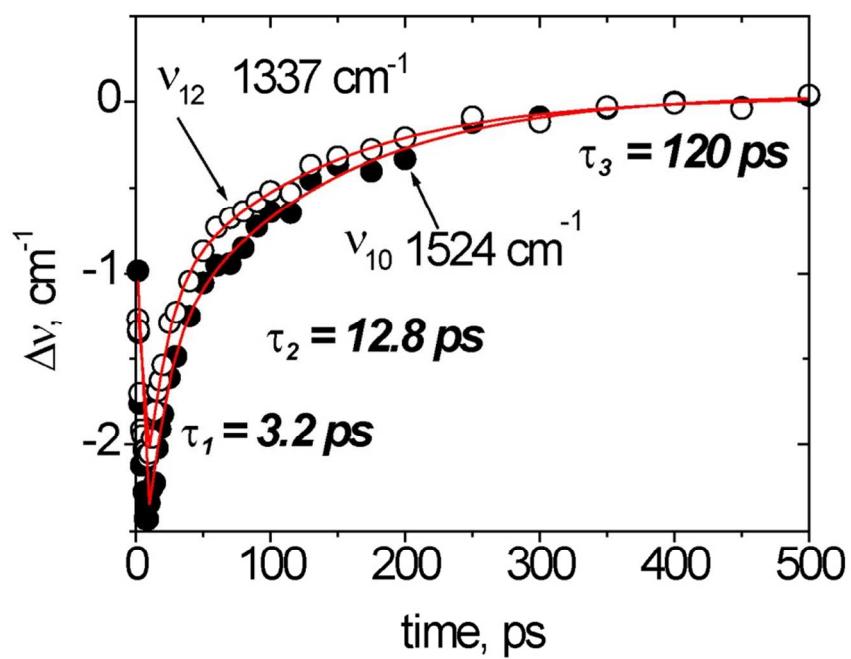

**Figure S3.** Frequency evolution of the ground state modes of  $\text{H}_2\text{Pc}(\text{OBu})_8$  in toluene. The red line corresponds to multi-exponential fit.
